# Supplementary material for: Studies on the thymine–mercury–thymine base pairing in parallel and anti-parallel DNA duplexes
Source: Royal Society of Chemistry journal article supplement (doi:10.1039/c5nj01859e), 2015-01-01
Supplement: c5nj01859e1.pdf [file c5nj01859e1.pdf]

Supporting Information

**Studies on the thymine-mercury-thymine base pairing in parallel and anti-parallel DNA duplexes**

Gaofeng Liu, Zhiwen Li, Junfei Zhu, Yang Liu, Zhibin Zheng, Ying Zhou, Junlin He

Figure S1 Melting curves of parallel duplex P01+P03 and single P03 at 260 and 295 nm 2

Figure S2 CD spectra of DNA complexes in the absence or presence of  $\text{Hg}^{2+}$  2

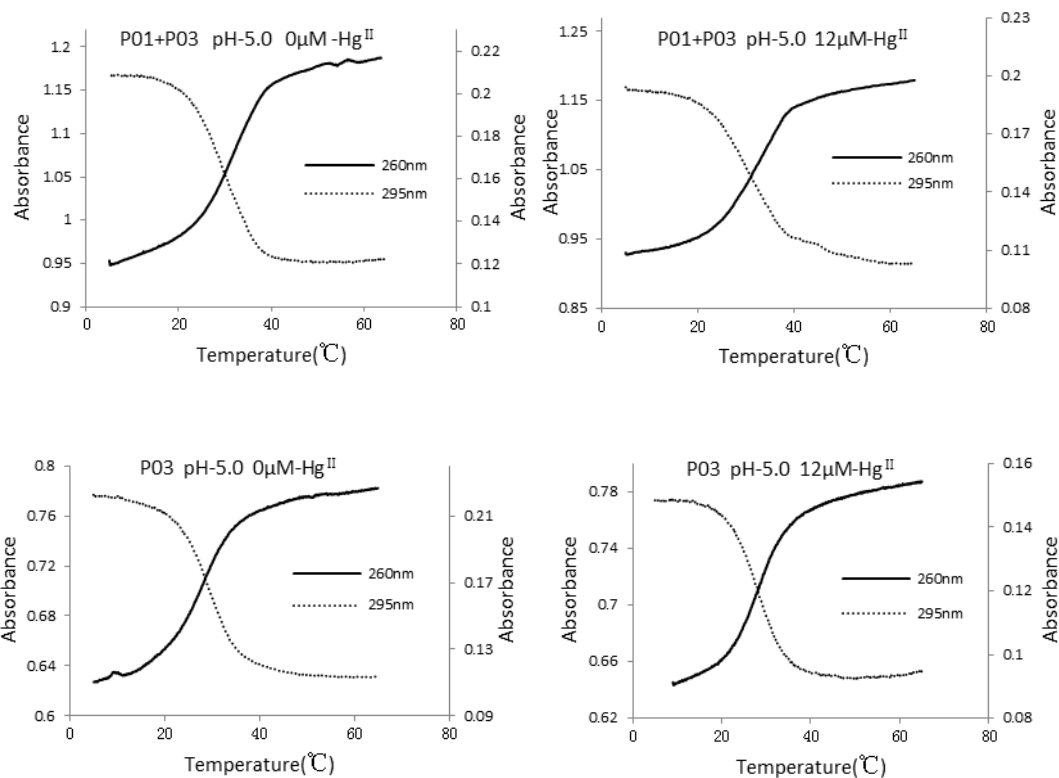

Figure S1 Melting curves of parallel duplex **P01+P03** and single **P03** at 260 (right Y axis) and 295 nm (left Y axis).

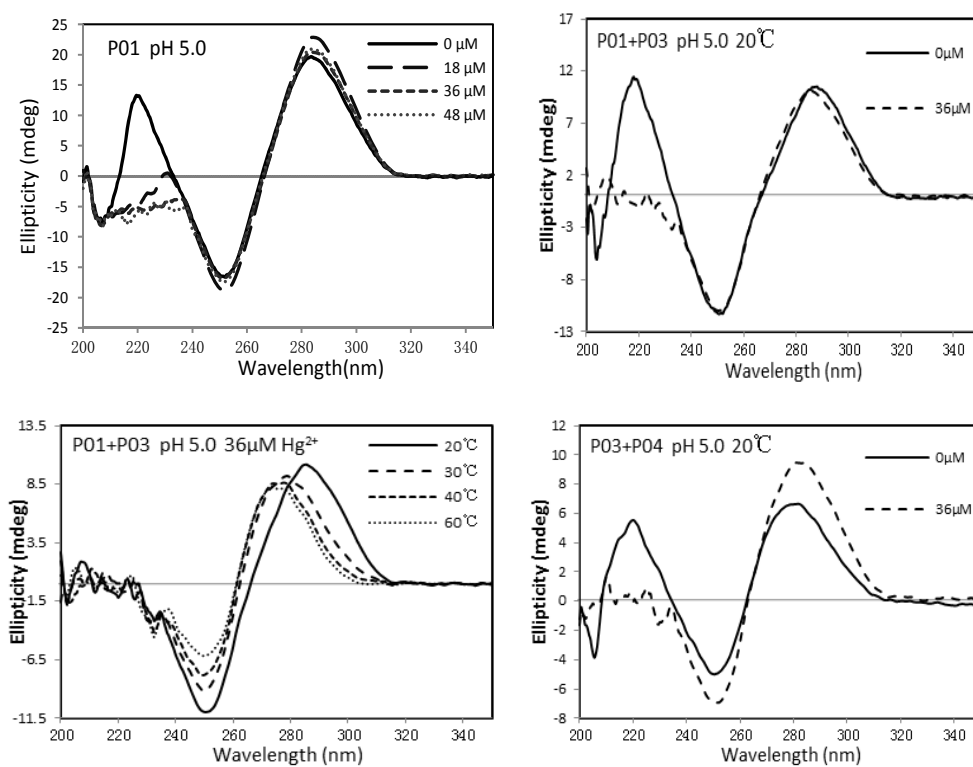

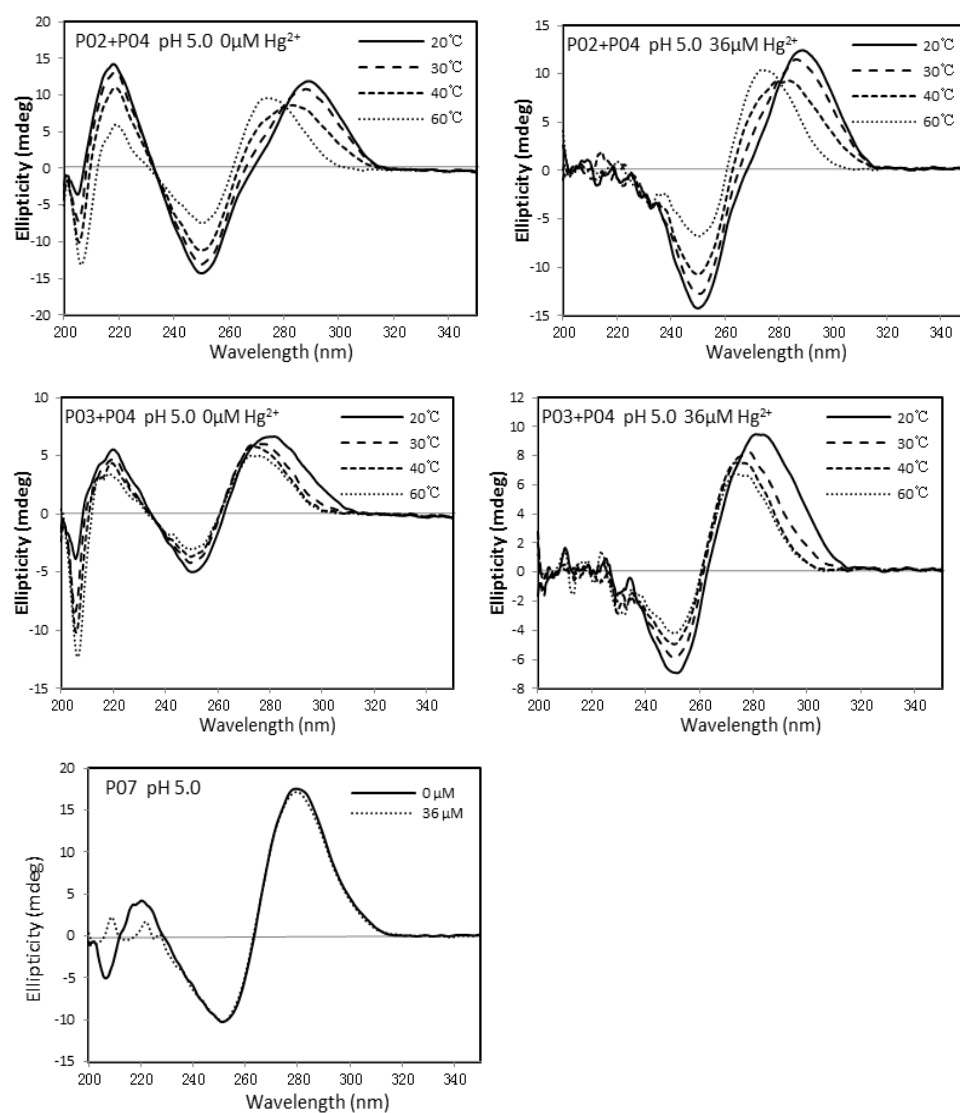

Figure S2 CD spectra of DNA complexes in the absence or presence of  $\text{Hg}^{2+}$ . The concentrations of all the samples were the same as those for  $T_m$  measurement.
